# Supplementary material for: Dietary Artemisia arborescens Supplementation Effects on Growth, Oxidative Status, and Immunity of Gilthead Seabream (Sparus aurata L.)
Source: MDPI journal article supplement (doi:10.3390/ani14081161), 2024-04-11
Supplement: s1 [file s1]

## Article

# Dietary *Artemisia arborescens* Supplementation Effects on Growth, Oxidative Status, and Immunity of Gilthead Seabream (*Sparus aurata* L.)

Odysseas-Panagiotis Tzortzatos <sup>1</sup>, Dimitra K. Toubanaki <sup>1</sup>, Markos N. Kolygas <sup>2</sup>, Yiannis Kotzamanis <sup>3</sup>, Efstratios Roussos <sup>3</sup>, Vasileios Bakopoulos <sup>3</sup>, Achilleas Chatzopoulos <sup>5</sup>, Fotini Athanassopoulou <sup>2</sup> and Evdokia Karagouni <sup>1,\*</sup>

## Supplementary material

**Table S1.** Primers and probes used in the present work.

| Gene         | Primer sequence (5' - 3')                                    | Accession number | Product size (bp) | Reference    |
|--------------|--------------------------------------------------------------|------------------|-------------------|--------------|
| <i>sod1</i>  | Up: TGTCTAACCTTGTCCGTTCTTC<br>Dp: CCGTTTATTCTACTTGTGCGTTAC   | JQ308832.1       | 105               | Present work |
| <i>gpx1</i>  | Up: ATGGAAAAGATGCCCCACCCC<br>Dp: CCTGACGGGACTCCAAATGA        | DQ524992.1       | 116               | Present work |
| <i>hep</i>   | Up: GCCATCGTGCTCACCTTTAT<br>Dp: CTGCTGCCATACCCCATCTT         | EF625900.1       | 152               | [31]         |
| <i>grp75</i> | Up: TCCGGTGTGGATCTGACCAAAGAC<br>Dp: TGTTTAGGCCCAGAAGCATCCATG | DQ524993.1       | 143               | [32]         |
| <i>il-1b</i> | Up: TCACTGGGCTGAACAACAG<br>Dp: GCACTCTCCTGGCACATATC          | AJ277166.2       | 106               | Present work |
| <i>il-10</i> | Up: TGCTCACTTGACTCTTCAGC<br>Dp: CAGGAGGAGAGACCGAGGAG         | JX976621.1       | 114               | Present work |
| <i>tgfb</i>  | Up: CTCTCCTCAAACACACACAGAG<br>Dp: CCACATTTCTCTCGTCCTCTTC     | AF424703.1       | 93                | Present work |
| <i>tnfa</i>  | Up: CCTCTCAGCCACAGGATCTC<br>Dp: CAGTTTGTGCGCTCTGTTC          | AJ413189.2       | 180               | Present work |
| <i>rsp18</i> | Up: AGGGTGTGTCGACGTTAC<br>Dp: CTTCTGCCTGTTGAGGAACC           | AM490061.1       | 164               | [33]         |

## References

- Reyes-Becerril, M.; Salinas, I.; Cuesta, A.; Meseguer, J.; Tovar-Ramirez, D.; Ascencio-Valle, F.; Esteban, M.A. Oral delivery of live yeast *Debaryomyces hansenii* modulates the main innate immune parameters and the expression of immune-relevant genes in the gilthead seabream (*Sparus aurata* L.). *Fish Shellfish Immunol.* **2008**, *25*(6), 731–739. <https://doi.org/10.1016/j.fsi.2008.02.010>.
- Sitjà-Bobadilla, A.; Caldach-Giner, J.; Saera-Vila, A.; Palenzuela, O.; Alvarez-Pellitero, P.; Pérez-Sánchez, J. Chronic exposure to the parasite *Enteromyxum leei* (Myxozoa: Myxosporea) modulates the immune response and the expression of growth, redox and immune relevant genes in gilthead sea bream, *Sparus aurata* L. *Fish Shellfish Immunol.* **2008**, *24*(5), 610–619. <https://doi.org/10.1016/j.fsi.2008.01.014>.
- Chaves-Pozo, E.; Liarte, S.; Fernández-Alacid, L.; Abellán, E.; Meseguer, J.; Mulero, V.; García-Ayala, A. Pattern of expression of immune-relevant genes in the gonad of a teleost, the gilthead seabream (*Sparus aurata* L.). *Mol. Immunol.* **2008**, *45*(10), 2998–3011. <https://doi.org/10.1016/j.molimm.2008.01.018>.

**Disclaimer/Publisher's Note:** The statements, opinions and data contained in all publications are solely those of the individual author(s) and contributor(s) and not of MDPI and/or the editor(s). MDPI and/or the editor(s) disclaim responsibility for any injury to people or property resulting from any ideas, methods, instructions or products referred to in the content.
